# Supplementary material for: Association between vitamin D supplementation and mortality: systematic review and meta-analysis
Source: PubMed Central journal article supplement — BMJ. 2019 Aug 12;366:l4673. doi: 10.1136/bmj.l4673 (PMC6689821; doi:10.1136/bmj.l4673), 2019-08-12

## Supplemental e-material

eTable 1: Definitions of outcomes

eTable 2: Search strategy

eTable 3: Study characteristics

eTable 4: Population characteristics of included studies

eTable 5: Ongoing large trial of vitamin D supplementation on mortality.

eTable 6. Summary of Findings and Strength of Evidence in Studies (GRADE)

eTable 7: Sensitivity analyses

eTable 8: Subgroup analysis of the effect of vitamin D on cancer mortality

eFigure 1: Risk of bias summary

eFigure 2: Risk of bias graph

eFigure 3: Trial sequential analysis for all-cause mortality, RRR=10%

eFigure 4: Trial sequential analysis for all-cause mortality, RRR=7.5%

eFigure 5: Trial sequential analysis for all-cause mortality, RRR=5%

eFigure 6: Funnel plot for all-cause mortality

eFigure 7: Forest plot of stroke mortality of all trials evaluating vitamin D supplementation

eFigure 8: Forest plot of myocardial infarction mortality of all trials evaluating vitamin D supplementation

eFigure 9: Meta-regression for all-cause mortality by 25(OH)D

eFigure 10: Meta-regression for all-cause mortality by length of follow-up

**eTable 1: Definitions of outcomes**

| <b>Outcomes</b>                          | <b>Definitions</b>                                                      |
|------------------------------------------|-------------------------------------------------------------------------|
| All-cause Mortality                      | Deaths from any causes                                                  |
| Cancer mortality                         | Deaths due to cancer                                                    |
| Cardiovascular mortality                 | Deaths due to cardiovascular disease                                    |
| Non-cancer, non-cardiovascular mortality | Deaths from any other causes excepted cancer and cardiovascular disease |
| Cerebrovascular disease mortality        | Deaths due to cerebrovascular disease                                   |
| Ischemic heart disease mortality         | Deaths due to ischemic heart disease                                    |

**eTable 2: Search strategy**

| <b>MEDLINE(R)</b> |                                                                                                                                                                                                                                                                                                                                                                                                                                                                                                                                                                                                                                                                                                                                                                                                                                                                                                                                                                        |         |
|-------------------|------------------------------------------------------------------------------------------------------------------------------------------------------------------------------------------------------------------------------------------------------------------------------------------------------------------------------------------------------------------------------------------------------------------------------------------------------------------------------------------------------------------------------------------------------------------------------------------------------------------------------------------------------------------------------------------------------------------------------------------------------------------------------------------------------------------------------------------------------------------------------------------------------------------------------------------------------------------------|---------|
| 1                 | exp Vitamin D/ad, ae, pd, tu [Administration & Dosage, Adverse Effects, Pharmacology, Therapeutic Use]                                                                                                                                                                                                                                                                                                                                                                                                                                                                                                                                                                                                                                                                                                                                                                                                                                                                 | 30296   |
| 2                 | ((vit-d? or vitamin-d? or dihydroxyvitamin D? or dihydroxy-vitamin D? or hydroxyvitamin D? or hydroxyl-vitamin d? or dihydrotachysterol or colecalciferol or epicalcetriol or oxacalcitriol or alfalcidol or calcifediol I or calciferol? or calcipotriol or calcitriol or dihydroxycolecalciferol or hydroxycolecalciferol or seocalcitol or tacalcitol or oxavitamin or hydroxycholecalciferol? or calcidiol or calcipotriene or dihydroxycholecalciferol? or dihydroxy-cholecalciferol or cholecalciferol? or ergocalciferol? or epiergocalciferol or dihydroxyergocalciferol or dihydroxy-ergocalciferol or hydroxyl-ergocalciferol or hydroxyergocalciferol or doxercalciferol or hydroxycalciferol or hydroxylcalciferol or dihydroxy-calciferol or dihydroxycalciferol or dihydrotachysterin or calcamine or ercalcidiol) adj5 (supplement* or therap* or treat* or prevent* or daily or receiv* or regimen or dose? or oral* or intramuscular or inject*)).mp. | 23153   |
| 3                 | randomized controlled trial.pt.                                                                                                                                                                                                                                                                                                                                                                                                                                                                                                                                                                                                                                                                                                                                                                                                                                                                                                                                        | 472058  |
| 4                 | controlled clinical trial.pt.                                                                                                                                                                                                                                                                                                                                                                                                                                                                                                                                                                                                                                                                                                                                                                                                                                                                                                                                          | 92771   |
| 5                 | random*.mp.                                                                                                                                                                                                                                                                                                                                                                                                                                                                                                                                                                                                                                                                                                                                                                                                                                                                                                                                                            | 1235825 |
| 6                 | placebo.ab.                                                                                                                                                                                                                                                                                                                                                                                                                                                                                                                                                                                                                                                                                                                                                                                                                                                                                                                                                            | 193707  |
| 7                 | drug therapy.fs.                                                                                                                                                                                                                                                                                                                                                                                                                                                                                                                                                                                                                                                                                                                                                                                                                                                                                                                                                       | 2065354 |
| 8                 | trial.ab.                                                                                                                                                                                                                                                                                                                                                                                                                                                                                                                                                                                                                                                                                                                                                                                                                                                                                                                                                              | 446799  |
| 9                 | groups.ab.                                                                                                                                                                                                                                                                                                                                                                                                                                                                                                                                                                                                                                                                                                                                                                                                                                                                                                                                                             | 1858094 |
| 10                | or/3-9                                                                                                                                                                                                                                                                                                                                                                                                                                                                                                                                                                                                                                                                                                                                                                                                                                                                                                                                                                 | 4587425 |
| 11                | exp animals/ not humans.sh.                                                                                                                                                                                                                                                                                                                                                                                                                                                                                                                                                                                                                                                                                                                                                                                                                                                                                                                                            | 4519948 |
| 12                | 10 not 11                                                                                                                                                                                                                                                                                                                                                                                                                                                                                                                                                                                                                                                                                                                                                                                                                                                                                                                                                              | 3961476 |
| 13                | (1 or 2) and 12                                                                                                                                                                                                                                                                                                                                                                                                                                                                                                                                                                                                                                                                                                                                                                                                                                                                                                                                                        | 16982   |
| 14                | limit 13 to "all adult (19 plus years)"                                                                                                                                                                                                                                                                                                                                                                                                                                                                                                                                                                                                                                                                                                                                                                                                                                                                                                                                | 8430    |
| <b>Embase</b>     |                                                                                                                                                                                                                                                                                                                                                                                                                                                                                                                                                                                                                                                                                                                                                                                                                                                                                                                                                                        |         |

|    |                                                                                                                                                                                                                                                                                                                                                                                                                                                                                                                                                                                                                                                                                                                                                                                                                                                                                                                                                                                                                                                                                                                                           |          |
|----|-------------------------------------------------------------------------------------------------------------------------------------------------------------------------------------------------------------------------------------------------------------------------------------------------------------------------------------------------------------------------------------------------------------------------------------------------------------------------------------------------------------------------------------------------------------------------------------------------------------------------------------------------------------------------------------------------------------------------------------------------------------------------------------------------------------------------------------------------------------------------------------------------------------------------------------------------------------------------------------------------------------------------------------------------------------------------------------------------------------------------------------------|----------|
| 1  | exp vitamin D/ae, ct, ad, cb, cm, cr, do, dt, ei, ce, ci, dl, du, ig, ly, im, na, os, tl, ur, ut, va, iv, vi, po, pa, oc, pd, cj, sb, li, tp, td [Adverse Drug Reaction, Clinical Trial, Drug Administration, Drug Combination, Drug Comparison, Drug Concentration, Drug Dose, Drug Therapy, Epidural Drug Administration, Intracerebral Drug Administration, Intracisternal Drug Administration, Intradermal Drug Administration, Intraduodenal Drug Administration, Intrahepatic Drug Administration, Intralymphatic Drug Administration, Intramuscular Drug Administration, Intranasal Drug Administration, Intraosseous Drug Administration, Intrathecal Drug Administration, Intraurethral Drug Administration, Intrauterine Drug Administration, Intravaginal Drug Administration, Intravenous Drug Administration, Intravitreal Drug Administration, Oral Drug Administration, Parenteral Drug Administration, Periocular Drug Administration, Pharmacology, Subconjunctival Drug Administration, Sublabial Drug Administration, Sublingual Drug Administration, Topical Drug Administration, Transdermal Drug Administration] () | 41677    |
| 2  | ((vit-d? or vitamin-d? or dihydroxyvitamin D? or dihydroxy-vitamin D? or hydroxyvitamin D? or hydroxylvitamin d? or dihydrotachysterol or colecalciferol or epicalcetriol or oxacalcitriol or alfalcidol or calcifediol I or calciferol? or calcipotriol or calcitriol or dihydroxycolecalciferol or hydroxycolecalciferol or seocalcitol or tacalcitol or oxavitamin or hydroxycholecalciferol? or calcidiol or calcipotriene or dihydroxycholecalciferol? or dihydroxy-cholecalciferol or cholecalciferol? or ergocalciferol? or epiergocalciferol or dihydroxyergocalciferol or dihydroxy-ergocalciferol or hydroxyl-ergocalciferol or hydroxyergocalciferol or doxercalciferol or hydroxycalciferol or hydroxyl-calciferol or dihydroxy-calciferol or dihydroxycalciferol or dihydrotachysterin or calcamine or ercalcidiol) adj5 (supplement* or therap* or treat* or prevent* or daily or receiv* or regimen or dose? or oral* or intramuscular or inject*).mp.                                                                                                                                                                     | 36502    |
| 3  | randomized controlled trial/                                                                                                                                                                                                                                                                                                                                                                                                                                                                                                                                                                                                                                                                                                                                                                                                                                                                                                                                                                                                                                                                                                              | 527802   |
| 4  | crossover procedure/                                                                                                                                                                                                                                                                                                                                                                                                                                                                                                                                                                                                                                                                                                                                                                                                                                                                                                                                                                                                                                                                                                                      | 57606    |
| 5  | double blind procedure/                                                                                                                                                                                                                                                                                                                                                                                                                                                                                                                                                                                                                                                                                                                                                                                                                                                                                                                                                                                                                                                                                                                   | 156224   |
| 6  | single blind procedure/                                                                                                                                                                                                                                                                                                                                                                                                                                                                                                                                                                                                                                                                                                                                                                                                                                                                                                                                                                                                                                                                                                                   | 33370    |
| 7  | (random* or factorial* or crossover* or placebo* or assign* or allocat* or volunteer* or (doubl* adj5 blind*) or (singl* adj5 blind*).mp.                                                                                                                                                                                                                                                                                                                                                                                                                                                                                                                                                                                                                                                                                                                                                                                                                                                                                                                                                                                                 | 2330598  |
| 8  | or/3-7                                                                                                                                                                                                                                                                                                                                                                                                                                                                                                                                                                                                                                                                                                                                                                                                                                                                                                                                                                                                                                                                                                                                    | 2330598  |
| 9  | exp animal/                                                                                                                                                                                                                                                                                                                                                                                                                                                                                                                                                                                                                                                                                                                                                                                                                                                                                                                                                                                                                                                                                                                               | 23506001 |
| 10 | human/                                                                                                                                                                                                                                                                                                                                                                                                                                                                                                                                                                                                                                                                                                                                                                                                                                                                                                                                                                                                                                                                                                                                    | 19009525 |
| 11 | 9 not 10                                                                                                                                                                                                                                                                                                                                                                                                                                                                                                                                                                                                                                                                                                                                                                                                                                                                                                                                                                                                                                                                                                                                  | 4496476  |
| 12 | 8 not 11                                                                                                                                                                                                                                                                                                                                                                                                                                                                                                                                                                                                                                                                                                                                                                                                                                                                                                                                                                                                                                                                                                                                  | 2105846  |
| 13 | (1 or 2) and 12                                                                                                                                                                                                                                                                                                                                                                                                                                                                                                                                                                                                                                                                                                                                                                                                                                                                                                                                                                                                                                                                                                                           | 13165    |
| 14 | limit 13 to (adult <18 to 64 years> or aged <65+ years>)                                                                                                                                                                                                                                                                                                                                                                                                                                                                                                                                                                                                                                                                                                                                                                                                                                                                                                                                                                                                                                                                                  | 5251     |

## EBM Reviews - Cochrane Central Register of Controlled Trials

|   |                                                                                                                                                                                                                                                                                                                                                                                                                                                                                                                                                                                                                                                                                                                                                                                                                                                                                                                                                                       |      |
|---|-----------------------------------------------------------------------------------------------------------------------------------------------------------------------------------------------------------------------------------------------------------------------------------------------------------------------------------------------------------------------------------------------------------------------------------------------------------------------------------------------------------------------------------------------------------------------------------------------------------------------------------------------------------------------------------------------------------------------------------------------------------------------------------------------------------------------------------------------------------------------------------------------------------------------------------------------------------------------|------|
| 1 | exp Vitamin D/ad, ae, pd, tu [Administration & Dosage, Adverse Effects, Pharmacology, Therapeutic Use]                                                                                                                                                                                                                                                                                                                                                                                                                                                                                                                                                                                                                                                                                                                                                                                                                                                                | 702  |
| 2 | ((vit-d? or vitamin-d? or dihydroxyvitamin D? or dihydroxy-vitamin D? or hydroxyvitamin D? or hydroxylvitamin d? or dihydrotachysterol or colecalciferol or epicalcetriol or oxacalcitriol or alfalcidol or calcifediol I or calciferol? or calcipotriol or calcitriol or dihydroxycolecalciferol or hydroxycolecalciferol or seocalcitol or tacalcitol or oxavitamin or hydroxycholecalciferol? or calcidiol or calcipotriene or dihydroxycholecalciferol? or dihydroxy-cholecalciferol or cholecalciferol? or ergocalciferol? or epiergocalciferol or dihydroxyergocalciferol or dihydroxy-ergocalciferol or hydroxyl-ergocalciferol or hydroxyergocalciferol or doxercalciferol or hydroxycalciferol or hydroxyl-calciferol or dihydroxy-calciferol or dihydroxycalciferol or dihydrotachysterin or calcamine or ercalcidiol) adj5 (supplement* or therap* or treat* or prevent* or daily or receiv* or regimen or dose? or oral* or intramuscular or inject*).mp. | 7606 |
| 3 | 1 or 2                                                                                                                                                                                                                                                                                                                                                                                                                                                                                                                                                                                                                                                                                                                                                                                                                                                                                                                                                                | 7688 |

**eTable 3: Study characteristics**

| <b>Trial</b>     | <b>Intervention</b>                                                                       | <b>Control</b>                  | <b>Primary outcome</b>     | <b>Follow-up</b> |
|------------------|-------------------------------------------------------------------------------------------|---------------------------------|----------------------------|------------------|
| Brohult 1973     | vitamin D3 (100,000 IU) daily                                                             | placebo                         | bone mineral density       | 1-year           |
| Inkovaara 1983   | vitamin D3 (1000 IU) daily                                                                | placebo                         | Biochemistry               | 1-year           |
| Corless 1985     | vitamin D2 (9000 IU) daily                                                                | placebo                         | activities of daily living | 9-month          |
| Lips 1996        | vitamin D3 (400 IU) daily                                                                 | placebo                         | Fracture                   | 3.5-year         |
| Meyer 2002       | vitamin D3 (400 IU) daily                                                                 | placebo                         | Fracture                   | 1-year           |
| Cooper 2003      | vitamin D2 (10,000 IU) weekly plus calcium (1000 mg) daily                                | calcium (1000 mg) daily         | bone mineral density       | 2-year           |
| Trivedi 2003     | vitamin D3 (100,000 IU) four-monthly                                                      | placebo                         | Fracture                   | 5-year           |
| Latham 2003      | vitamin D3 (300,000 IU) single dose plus exercise                                         | placebo plus exercise           | Health                     | 6-month          |
| Bischoff 2003    | vitamin D3 (800 IU) plus calcium 1200 mg daily                                            | calcium (1200 mg) daily         | Falls                      | 3-month          |
| Harwood 2004     | vitamin D2 (300,000 IU) single dose                                                       | placebo                         | bone biochemical markers   | 1-year           |
| Flicker 2005     | vitamin D3 (10,000 IU) weekly then vitamin D3 (1000 IU) daily plus calcium (600 mg) daily | calcium (600 mg) daily          | falls and fractures        | 2-year           |
| Aloia 2005       | vitamin D3 (800 IU) plus calcium (1200 - 1500 mg) daily                                   | calcium (1200-1500 mg) daily    | bone mineral density       | 2-year           |
| Law 2006         | vitamin D2 (1100 IU) daily                                                                | no intervention                 | Fractures and falls        | 10-month         |
| Schleithoff 2006 | vitamin D3 (2000 IU) plus calcium (500 mg) daily                                          | calcium (500 mg) daily          | Biochemistry               | 1.25-year        |
| Lyons 2007       | vitamin D2 (100,000 IU) four-monthly                                                      | placebo                         | Fracture                   | 3-year           |
| Smith 2007       | vitamin D2 (300,000 IU) yearly                                                            | placebo                         | Fracture                   | 3-year           |
| Broe 2007        | vitamin D2 (800 IU, 600IU, 400IU, or 200 IU) daily                                        | placebo                         | Falls                      | 5-month          |
| Burleigh 2007    | vitamin D3 (800 IU) plus calcium (1200 mg) daily                                          | calcium (1200 mg) daily         | Falls                      | 30-day           |
| Lappe 2007       | vitamin D3 (1000 IU) plus calcium (1400 to 1500 mg) daily                                 | calcium (1400 to 1500 mg) daily | bone mineral density       | 4-year           |
| Chel 2008        | vitamin D3 (600 IU) daily, (4200 IU) weekly or (18,000 IU) monthly                        | placebo                         | 25(OH)D levels             | 4.5-month        |
| Prince 2008      | vitamin D2 1000 IU plus calcium 1000 mg daily                                             | calcium (1000 mg) daily         | Falls                      | 1-year           |

|                  |                                                                             |                                    |                                                      |          |
|------------------|-----------------------------------------------------------------------------|------------------------------------|------------------------------------------------------|----------|
| Zhu 2008         | vitamin D2 (1000 IU) plus calcium (1200 mg) daily                           | calcium (1200 mg) daily            | bone mineral density                                 | 5-year   |
| Witham 2010      | vitamin D2 (10,000 IU) tablet at baseline and 10 weeks                      | placebo                            | six-minute walk test                                 | 20-week  |
| Sanders 2010     | vitamin D3 (500,000 IU) yearly                                              | placebo                            | falls and fractures                                  | 3-year   |
| Lips 2010        | vitamin D3 (8400 IU) weekly                                                 | placebo                            | Fracture                                             | 16-week  |
| Janssen 2010     | vitamin D3 (400 IU) plus calcium (500 mg) daily                             | calcium (500 mg) daily             | Biochemistry                                         | 6-month  |
| Grimnes 2011     | vitamin D3 (20,000 IU) twice weekly                                         | placebo                            | insulin sensitivity and secretion                    | 6-month  |
| Cherniack 2011   | vitamin D3 (2000 IU) daily                                                  | placebo                            | Biochemistry                                         | 6-month  |
| Glendenning 2012 | vitamin D3 150,000 IU three-monthly                                         | placebo                            | falls                                                | 9-month  |
| Lehouck 2012     | vitamin D3 100,000 IU monthly                                               | placebo                            | COPD exacerbation                                    | 1-year   |
| Punthakee 2012   | vitamin D3 (1000 IU) daily                                                  | placebo                            | all-cause death or cancers requiring hospitalization | 5-month  |
| RECORD 2012      | vitamin D3 (800 IU) daily; vitamin D3 (800 IU) plus calcium (1000 mg) daily | Placebo; calcium (1000 mg) daily   | Fracture                                             | 45-month |
| Witham 2013      | vitamin D3 (100,000 IU) three-monthly                                       | placebo                            | 25OHD levels                                         | 1-year   |
| Massart 2014     | vitamin D3 (25,000 IU) weekly                                               | placebo                            | 25(OH)D levels                                       | 13-week  |
| Rizzoli 2014     | vitamin D3 (1000 IU) daily plus strontium ranelate (2000 mg) daily          | strontium ranelate (2000 mg) daily | Biochemistry                                         | 6-month  |
| Martineau 2015   | vitamin D3 (120,000 IU) two-monthly                                         | placebo                            | COPD exacerbation                                    | 1-year   |
| Hansen 2015      | vitamin D3 (800 IU) daily; vitamin D3 (50,000 IU) two-weekly                | placebo                            | bone mineral density                                 | 2-year   |
| Uusi-Rasi 2015   | vitamin D3 (800 IU) daily; vitamin D3 (800 IU) daily plus exercise          | placebo; placebo plus exercise     | falls                                                | 2-year   |
| Baron 2015       | vitamin D3 (1000 IU) daily plus calcium (1200 mg) daily                     | calcium (1200 mg) daily            | adenomas incidence                                   | 3-year   |
| Jin 2016         | vitamin D3 (50,000 IU) monthly                                              | placebo                            | tibial cartilage volume and pain score               | 2-year   |
| Jorde 2016       | vitamin D3 (20 000 IU) weekly                                               | placebo                            | progression to type 2 diabetes                       | 5-year   |
| Arden 2016       | vitamin D3 (800 IU) daily                                                   | placebo                            | joint space narrowing                                | 3-year   |
| Witte 2016       | vitamin D3 (4000 IU) daily                                                  | placebo                            | 6-min walk test distance                             | 1-year   |
| ViDA 2017        | vitamin D3 initial (200000 IU) then vitamin D3 (100,000 IU) monthly         | placebo                            | CVD and death                                        | 3.3-year |
| EVITA 2017       | vitamin D3 (4000 IU) daily                                                  | placebo                            | all-cause mortality                                  | 3-year   |

|            |                                                                                          |                                              |                                        |         |
|------------|------------------------------------------------------------------------------------------|----------------------------------------------|----------------------------------------|---------|
| Hin 2017   | vitamin D3 (4000/2000 IU) daily                                                          | placebo                                      | Biochemistry                           | 1-year  |
| Levis 2017 | vitamin D3 (4000 IU) daily                                                               | placebo                                      | SPPB score and gait speed              | 9-month |
| Owusu 2018 | vitamin D3 (2400 IU, 3600 IU or 4800 IU) daily plus calcium (1200mg) daily               | calcium (1200 mg) daily                      | cognitive decline                      | 3-year  |
| Akiba 2018 | vitamin D3 (1200 IU) daily                                                               | placebo                                      | RFS and OS                             | 1-year  |
| VITAL 2018 | vitamin D3 (2000 IU) daily; vitamin D3 (800 IU) plus Omega-3 fatty acids (1000 mg) daily | Placebo; Omega-3 fatty acids (1000 mg) daily | cancer and major cardiovascular events | 6-year  |

**eTable 4: Population characteristics of included studies**

| Trial               | Participants<br>(vitamin D / no<br>vitamin D) | Mean age<br>(years) | Female | Baseline mean<br>25OHD<br>(nmol/L)<br>vitamin D/no<br>vitamin D | Achieved<br>mean 25OHD<br>(nmol/L)<br>vitamin D/no<br>vitamin D |
|---------------------|-----------------------------------------------|---------------------|--------|-----------------------------------------------------------------|-----------------------------------------------------------------|
| Brohult 1973        | 25/25                                         | 52                  | 68%    | NR/NR                                                           | NR/NR                                                           |
| Inkovaara 1983      | 45/42                                         | 79.5                | 17%    | NR/NR                                                           | NR/NR                                                           |
| Corless 1985        | 41/41                                         | 82.4                | 78%    | 18/17                                                           | 110/20                                                          |
| Lips 1996           | 1291/1287                                     | 80                  | 74%    | 26/27                                                           | 54/23                                                           |
| Meyer 2002          | 569/575                                       | 84.7                | 75%    | 47/51                                                           | 64/46                                                           |
| Cooper 2003         | 93/94                                         | 56                  | 100%   | 82/83                                                           | 81/70                                                           |
| Trivedi 2003        | 1345/1341                                     | 74.7                | 24%    | NS/NS                                                           | 74/53                                                           |
| Latham 2003         | 121/122                                       | 85                  | 100%   | 38/48                                                           | 60/48                                                           |
| Bischoff 2003       | 62/60                                         | 85.3                | 100%   | 31/29                                                           | 66/29                                                           |
| Harwood 2004        | 38/37                                         | 81.2                | 100%   | 28/30                                                           | 45/32                                                           |
| Flicker 2005        | 313/312                                       | 83.4                | 95%    | NR/NR                                                           | NR/NR                                                           |
| Aloia 2005          | 104/104                                       | 60                  | NS     | 47/43                                                           | 87/NR                                                           |
| Law 2006            | 1762/1955                                     | 85                  | 76%    | 59                                                              | 77                                                              |
| Schleithoff 2006    | 61/62                                         | 51                  | 17%    | 36/38                                                           | 103/47                                                          |
| Lyons 2007          | 1725/1715                                     | 84                  | 76%    | NS/NS                                                           | 80/54                                                           |
| Smith 2007          | 4727/4713                                     | 75                  | 54%    | 56.5                                                            | 171                                                             |
| Broe 2007           | 99/25                                         | 89                  | 73%    | 48/53                                                           | 63/60                                                           |
| Burleigh 2007       | 100/103                                       | 83                  | 59%    | 25/22                                                           | 27/22                                                           |
| Lappe 2007          | 446/445                                       | 66.7                | 100%   | 72/72                                                           | 96/71                                                           |
| Chel 2008           | 166/172                                       | 84                  | 77%    | 25/25                                                           | 63/27                                                           |
| Prince 2008         | 151/151                                       | 77.2                | 100%   | 45/44                                                           | 60/45-55                                                        |
| Zhu 2008            | 39/40                                         | 75                  | 100%   | 70/67                                                           | 106/64                                                          |
| Witham 2010         | 53/52                                         | 79.7                | 34%    | 21/24                                                           | NR/NR                                                           |
| Sanders 2010        | 1131/1125                                     | 76                  | 100%   | 53/45                                                           | 65/45                                                           |
| Lips 2010           | 114/112                                       | 78                  | NS     | 34/35                                                           | 65/35                                                           |
| Janssen 2010        | 36/34                                         | 65                  | 100%   | 33/34                                                           | 77/42                                                           |
| Grimnes 2011        | 51/53                                         | 51.5                | 45%    | 42/39                                                           | 143/43                                                          |
| Cherniack 2011      | 23/23                                         | 80                  | 2%     | 71/69                                                           | 107/72                                                          |
| Glendenning<br>2012 | 353/333                                       | 76.7                | 100%   | 65/67                                                           | 75/61                                                           |
| Lehouck 2012        | 91/91                                         | 68                  | 20%    | 50/50                                                           | 130/55                                                          |
| Punthakee 2012      | 607/614                                       | 66.7                | 40%    | NR/NR                                                           | NR/NR                                                           |
| RECORD 2012         | 2649/2643                                     | 77                  | 85%    | 38/38                                                           | 62/NR                                                           |
| Witham 2013         | 80/79                                         | 76.8                | 48%    | 45/45                                                           | 65/48                                                           |
| Massart 2014        | 29/32                                         | 64                  | 56%    | 43/46                                                           | 88/41                                                           |
| Rizzoli 2014        | 413/105                                       | 67                  | 90%    | 44/44                                                           | 65/49                                                           |
| Martineau 2015      | 122/118                                       | 65                  | 41%    | 45/47                                                           | 67/47                                                           |
| Hansen 2015         | 154/76                                        | 61                  | 100%   | 53/53                                                           | 86/45                                                           |
| Uusi-Rasi 2015      | 204/205                                       | 74                  | 100%   | 66/69                                                           | 93/69                                                           |
| Baron 2015          | 1130/1129                                     | 58                  | 37%    | 63/63                                                           | NR/NR                                                           |
| Jin 2016            | 209/204                                       | 63                  | 50%    | 44/44                                                           | 211/127                                                         |
| Jorde 2016          | 256/255                                       | 62                  | 49%    | 60/61                                                           | 122/67                                                          |
| Arden 2016          | 237/237                                       | 64                  | 61%    | 21/21                                                           | 76/51                                                           |
| Witte 2016          | 114/109                                       | 69                  | 21%    | 38/36                                                           | 115/25                                                          |
| ViDA 2017           | 2558/2552                                     | NS                  | 58%    | 64/63                                                           | 135/66                                                          |
| EVITA 2017          | 199/201                                       | 55                  | 27%    | 31/35                                                           | 103/44                                                          |
| Hin 2017            | 204/101                                       | 72                  | 48%    | 53/47                                                           | 120/53                                                          |
| Levis 2017          | 66/64                                         | 72                  | 0%     | 58/55                                                           | 115/60                                                          |



|            |             |    |      |       |         |
|------------|-------------|----|------|-------|---------|
| Owusu 2018 | 130/130     | 68 | 100% | 55/56 | 117/52  |
| Akiba 2018 | 77/78       | 68 | 38%  | 53/55 | 93/60   |
| VITAL 2018 | 12927/12944 | 67 | 51%  | 77/77 | 104/ NR |

NR: not reported

**eTable 5: Ongoing large trial of vitamin D supplementation on mortality.**

| Registration        | Name      | Location  | Participants (age) | Dose                 | Main outcomes                                                                  | Current state                          | Results expected              |
|---------------------|-----------|-----------|--------------------|----------------------|--------------------------------------------------------------------------------|----------------------------------------|-------------------------------|
| NCT01745263         | DO-HEALTH | Europe    | 2,152<br>70+       | 2,000 IU<br>daily    | fractures, infections,<br>cognition, function,<br>blood pressure;<br>mortality | Completed;<br>recruitment<br>completed | Fall 2019                     |
| ACTRN12613000743763 | D-Health  | Australia | 21,315<br>60-79    | 60,000 IU<br>monthly | All-cause mortality;<br>cancer                                                 | Ongoing;<br>recruitment<br>completed   | 2024                          |
| ISRCTN46328341      | VIDAL     | UK        | 20,000<br>65-84    | 60,000 IU<br>monthly | Mortality, longevity,<br>cancer                                                | Ongoing;<br>recruitment<br>completed   | 2020 for<br>the main<br>study |

**eTable 6: Summary of Findings and Strength of Evidence in Studies**

| Outcome                                       | No. of patients<br>(Studies) | Risk ratio<br>(95% CI)    | I <sup>2</sup> | Absolute effect estimates<br>(per 1000) |           |               | Quality |
|-----------------------------------------------|------------------------------|---------------------------|----------------|-----------------------------------------|-----------|---------------|---------|
|                                               |                              |                           |                | Control                                 | Vitamin D | Difference    |         |
| All-cause Mortality                           | 74655<br>(50)                | RR 0.98<br>(0.95 to 1.02) | 0%             | 109                                     | 107       | -2 (-5 to 2)  | High    |
| Cancer mortality                              | 39197<br>(5)                 | RR 0.85<br>(0.74 to 0.97) | 0%             | 24                                      | 20        | -4 (-1 to -6) | High    |
| Cardiovascular mortality                      | 43306<br>(12)                | RR 0.98<br>(0.88 to 1.08) | 0%             | 31                                      | 30        | -1 (-4 to 2)  | High    |
| Non-cancer,<br>noncardiovascular<br>mortality | 36358 (4)                    | RR 1.05<br>(0.93 to 1.18) | 0%             | 28                                      | 29        | 1 (-2 to 5)   | High    |

**eTable 7: Sensitivity analyses**

| Sensitivity analyses                                                                    | Risk Ratio,<br>95% CI | I <sup>2</sup> | P    |
|-----------------------------------------------------------------------------------------|-----------------------|----------------|------|
| Excluding studies with high or unknow risk of bias                                      | 0.97 [0.92, 1.02]     | 0%             | 0.22 |
| Excluding studies with high or unknow risk of bias of the different domains             |                       |                |      |
| Sequence generation                                                                     | 0.99 [0.95, 1.03]     | 0%             | 0.47 |
| Allocation concealment                                                                  | 0.97 [0.93, 1.01]     | 0%             | 0.14 |
| Blinding of patients and personnel                                                      | 0.97 [0.93, 1.01]     | 0%             | 0.10 |
| Blinding of outcome assessors                                                           | 0.98 [0.95, 1.02]     | 0%             | 0.40 |
| Incomplete outcome data                                                                 | 0.98 [0.95, 1.02]     | 0%             | 0.41 |
| Selective reporting                                                                     | 0.98 [0.93, 1.02]     | 0%             | 0.33 |
| Other bias                                                                              | 0.97 [0.93, 1.01]     | 0%             | 0.09 |
| Excluding quasi-randomized or cluster-randomized trials                                 | 0.97 [0.93, 1.01]     | 0%             | 0.09 |
| Excluding the largest trial                                                             | 0.98 [0.95, 1.02]     | 0%             | 0.43 |
| Excluding trials with follow-up less than 1 year                                        | 0.97 [0.93, 1.00]     | 0%             | 0.08 |
| Using random-effect models                                                              | 0.98 [0.95, 1.02]     | 0%             | 0.39 |
| Adding trials that have been excluded for vitamin D coadministered with calcium         | 0.96 [0.92, 1.01]     | 0%             | 0.43 |
| Adding trials that have been excluded for hydroxylated vitamin D or vitamin D analogues | 0.98 [0.93, 1.03]     | 0%             | 0.85 |
| Using trial duration rather than long term follow-up                                    | 0.99 [0.95, 1.03]     | 0%             | 0.61 |

**eTable 8: Subgroup analysis of the effect of vitamin D on cancer mortality**

Subgroup title

|                           | No. of trials | No. of patients | I <sup>2</sup> | Risk Ratio, 95%CI  | P for interaction |
|---------------------------|---------------|-----------------|----------------|--------------------|-------------------|
| Overall                   | 5             | 39197           | 0%             | 0.84 [0.74, 0.96]  |                   |
| No. of patients           |               |                 |                |                    |                   |
| ≥2000                     | 4             | 38957           | 0%             | 0.85 [0.74, 0.97]  | 0.93              |
| <2000                     | 1             | 230             | NA             | 0.97 [0.06, 15.29] |                   |
| No. of events             |               |                 |                |                    |                   |
| ≥200                      | 2             | 31163           | 0%             | 0.84 [0.72, 0.97]  | 0.69              |
| <200                      | 3             | 8034            | 0%             | 0.89 [0.68, 1.17]  |                   |
| Age                       |               |                 |                |                    |                   |
| ≥70                       | 2             | 7978            | 0%             | 0.85 [0.72, 1.02]  | 0.90              |
| <70                       | 3             | 31219           | 0%             | 0.84 [0.69, 1.02]  |                   |
| Sex                       |               |                 |                |                    |                   |
| Female                    | 0             | 0               | NA             | NA                 | NA                |
| Both                      | 5             | 39197           | 0%             | 0.84 [0.74, 0.96]  |                   |
| Baseline 25(OH)D (nmol/L) |               |                 |                |                    |                   |
| ≥50                       | 2             | 30979           | 0%             | 0.84 [0.69, 1.02]  | 0.95              |
| <50                       | 2             | 5532            | 0%             | 0.85 [0.69, 1.04]  |                   |
| Published year            |               |                 |                |                    |                   |
| Before 2014               | 2             | 7978            | 0%             | 0.85 [0.72, 1.02]  | 0.90              |
| In or after 2014          | 3             | 31219           | 0%             | 0.84 [0.69, 1.02]  |                   |
| Type of vitamin D         |               |                 |                |                    |                   |
| Vitamin D3                | 5             | 39197           | 0%             | 0.84 [0.74, 0.96]  | NA                |
| Vitamin D2                | 0             | 0               | NA             | NA                 |                   |
| Daily dose equivalent     |               |                 |                |                    |                   |
| ≥2000 IU                  | 3             | 31219           | 0%             | 0.84 [0.69, 1.02]  | 0.90              |
| <2000 IU                  | 2             | 7978            | 0%             | 0.85 [0.72, 1.02]  |                   |
| Timing                    |               |                 |                |                    |                   |
| Daily                     | 2             | 31163           | 0%             | 0.84 [0.72, 0.97]  | 0.69              |
| Intermittently            | 3             | 8034            | 0%             | 0.89 [0.68, 1.17]  |                   |
| Residential status        |               |                 |                |                    |                   |
| Community                 | 5             | 39197           | 0%             | 0.84 [0.74, 0.96]  | NA                |
| Institution               | 0             | 0               | NA             | NA                 |                   |
| Follow-up                 |               |                 |                |                    |                   |
| Follow-up ≥3 y            | 4             | 39197           | 0%             | 0.85 [0.74, 0.97]  | 0.93              |
| Follow-up <3 y            | 1             | 240             | NA             | 0.97 [0.06, 15.29] |                   |

e

**Figure 1: Risk of bias summary: review authors' judgements about each risk of bias item for each included study.**

|                  | Random sequence generation (selection bias) | Allocation concealment (selection bias) | Blinding of participants and personnel (performance bias) | Blinding of outcome assessment (detection bias) | Incomplete outcome data (attrition bias) | Selective reporting (reporting bias) | Other bias |
|------------------|---------------------------------------------|-----------------------------------------|-----------------------------------------------------------|-------------------------------------------------|------------------------------------------|--------------------------------------|------------|
| Akiba 2018       | ●                                           | ●                                       | ●                                                         | ●                                               | ●                                        | ●                                    | ●          |
| Aloia 2005       | ●                                           | ?                                       | ●                                                         | ●                                               | ●                                        | ?                                    | ●          |
| Arden 2016       | ●                                           | ●                                       | ●                                                         | ●                                               | ●                                        | ●                                    | ●          |
| Baron 2015       | ●                                           | ●                                       | ●                                                         | ●                                               | ●                                        | ●                                    | ●          |
| Bischoff 2003    | ?                                           | ●                                       | ●                                                         | ●                                               | ●                                        | ●                                    | ●          |
| Broe 2007        | ●                                           | ●                                       | ●                                                         | ●                                               | ●                                        | ●                                    | ●          |
| Brohult 1973     | ?                                           | ?                                       | ?                                                         | ?                                               | ?                                        | ●                                    | ●          |
| Burleigh 2007    | ●                                           | ●                                       | ●                                                         | ●                                               | ●                                        | ●                                    | ●          |
| Chel 2008        | ?                                           | ?                                       | ?                                                         | ●                                               | ●                                        | ●                                    | ●          |
| Chemack 2011     | ●                                           | ●                                       | ●                                                         | ●                                               | ●                                        | ?                                    | ●          |
| Cooper 2003      | ?                                           | ?                                       | ●                                                         | ●                                               | ●                                        | ?                                    | ●          |
| Cortess 1985     | ●                                           | ●                                       | ●                                                         | ●                                               | ●                                        | ?                                    | ●          |
| EVITA 2017       | ●                                           | ●                                       | ●                                                         | ●                                               | ●                                        | ●                                    | ●          |
| Flicker 2005     | ●                                           | ●                                       | ●                                                         | ●                                               | ●                                        | ●                                    | ●          |
| Glendenning 2012 | ●                                           | ●                                       | ●                                                         | ●                                               | ●                                        | ●                                    | ●          |
| Grimes 2011      | ●                                           | ●                                       | ●                                                         | ●                                               | ●                                        | ●                                    | ●          |
| Hansen 2015      | ?                                           | ●                                       | ●                                                         | ●                                               | ●                                        | ●                                    | ●          |
| Harwood 2004     | ●                                           | ●                                       | ●                                                         | ●                                               | ●                                        | ●                                    | ●          |
| Hin 2017         | ●                                           | ●                                       | ●                                                         | ●                                               | ●                                        | ?                                    | ●          |
| Inkovaara 1983   | ?                                           | ?                                       | ?                                                         | ?                                               | ?                                        | ?                                    | ●          |
| Janssen 2010     | ●                                           | ●                                       | ●                                                         | ●                                               | ●                                        | ●                                    | ●          |
| Jin 2016         | ●                                           | ●                                       | ●                                                         | ●                                               | ●                                        | ●                                    | ●          |
| Jorde 2016       | ●                                           | ●                                       | ?                                                         | ●                                               | ●                                        | ?                                    | ●          |
| Lappe 2007       | ?                                           | ?                                       | ●                                                         | ●                                               | ●                                        | ?                                    | ●          |
| Latham 2003      | ●                                           | ●                                       | ●                                                         | ●                                               | ●                                        | ●                                    | ●          |
| Law 2006         | ?                                           | ?                                       | ●                                                         | ●                                               | ●                                        | ?                                    | ?          |
| Lehouck 2012     | ●                                           | ●                                       | ●                                                         | ●                                               | ●                                        | ?                                    | ●          |
| Levis 2017       | ?                                           | ●                                       | ●                                                         | ●                                               | ●                                        | ●                                    | ●          |
| Lips 1996        | ●                                           | ●                                       | ●                                                         | ●                                               | ●                                        | ●                                    | ●          |
| Lips 2010        | ●                                           | ●                                       | ●                                                         | ●                                               | ●                                        | ●                                    | ●          |
| Lyons 2007       | ●                                           | ●                                       | ●                                                         | ●                                               | ●                                        | ●                                    | ●          |
| Martineau 2015   | ●                                           | ●                                       | ●                                                         | ●                                               | ?                                        | ●                                    | ●          |
| Massart 2014     | ●                                           | ?                                       | ●                                                         | ●                                               | ●                                        | ●                                    | ●          |
| Meyer 2002       | ?                                           | ●                                       | ●                                                         | ●                                               | ●                                        | ●                                    | ●          |
| Owusu 2018       | ●                                           | ●                                       | ●                                                         | ●                                               | ●                                        | ?                                    | ●          |
| Prince 2008      | ●                                           | ●                                       | ●                                                         | ●                                               | ●                                        | ●                                    | ●          |
| Punthakee 2012   | ●                                           | ●                                       | ●                                                         | ●                                               | ●                                        | ?                                    | ●          |
| RECORD 2012      | ●                                           | ●                                       | ●                                                         | ●                                               | ●                                        | ?                                    | ●          |
| Rizzoli 2014     | ?                                           | ●                                       | ●                                                         | ●                                               | ●                                        | ●                                    | ●          |
| Sanders 2010     | ●                                           | ●                                       | ●                                                         | ●                                               | ●                                        | ●                                    | ●          |
| Schleithoff 2006 | ●                                           | ●                                       | ●                                                         | ●                                               | ●                                        | ?                                    | ●          |
| Smith 2007       | ?                                           | ●                                       | ●                                                         | ●                                               | ●                                        | ?                                    | ●          |
| Tnvedi 2003      | ●                                           | ●                                       | ●                                                         | ●                                               | ●                                        | ●                                    | ●          |
| Uusi-Rasi 2015   | ●                                           | ●                                       | ●                                                         | ●                                               | ●                                        | ●                                    | ●          |
| VIDA 2017        | ●                                           | ●                                       | ●                                                         | ●                                               | ●                                        | ●                                    | ●          |
| VITAL 2018       | ●                                           | ●                                       | ●                                                         | ●                                               | ●                                        | ●                                    | ●          |
| Witham 2010      | ●                                           | ●                                       | ●                                                         | ●                                               | ●                                        | ●                                    | ●          |
| Witham 2013      | ●                                           | ●                                       | ●                                                         | ●                                               | ●                                        | ●                                    | ●          |
| Witte 2016       | ●                                           | ●                                       | ●                                                         | ●                                               | ●                                        | ●                                    | ●          |
| Zhu 2008         | ●                                           | ●                                       | ●                                                         | ●                                               | ●                                        | ?                                    | ●          |

**e Figure 2: Risk of bias graph: review authors' judgements about each risk of bias item presented as percentages across all included studies**

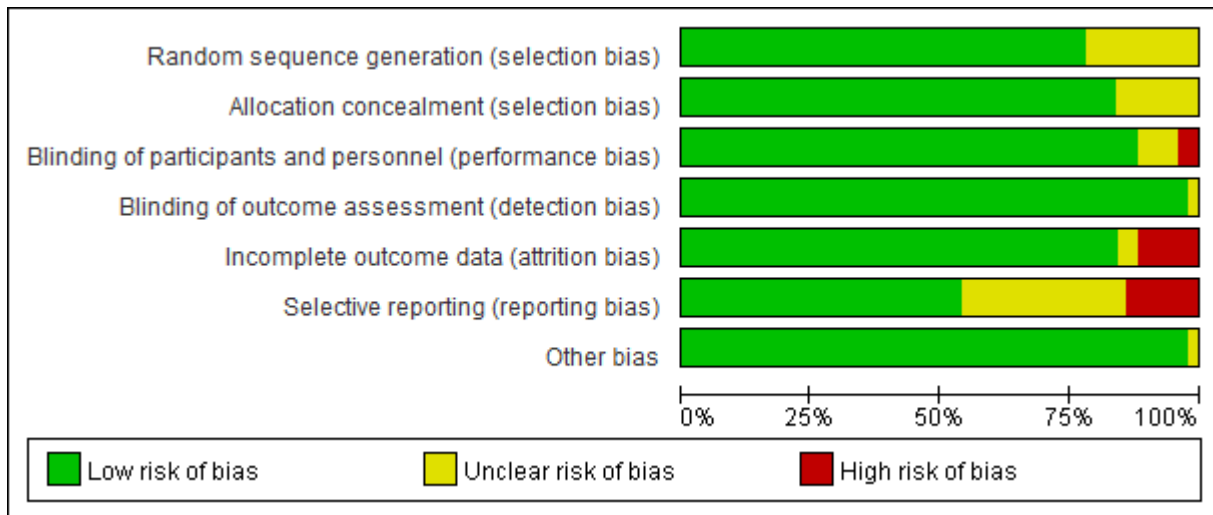

**e Figure 3: Trial sequential analysis for all-cause mortality, RRR=10%**

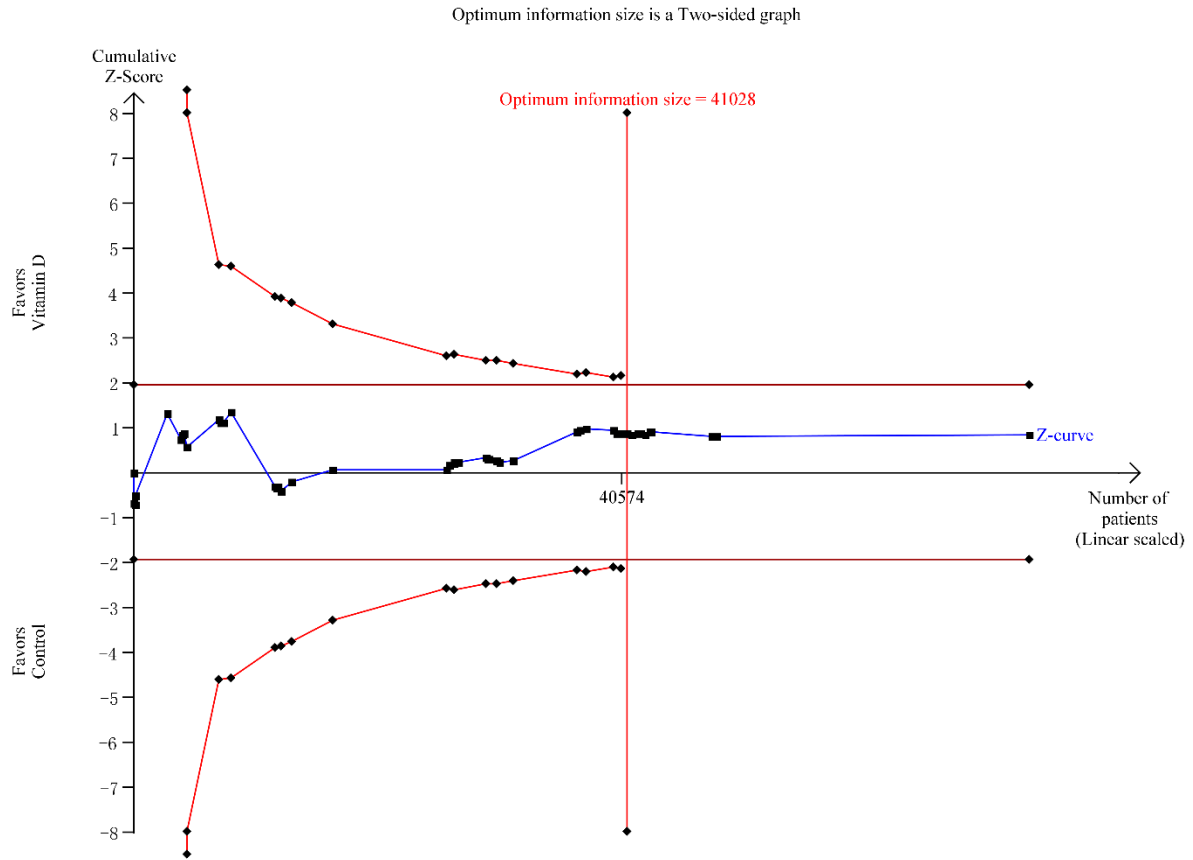

A diversity-adjusted information size (DIS) size of 41028 patients was calculated based on an anticipated relative risk reduction (RRR) of 10% (event proportion of 12% in the control arm,  $\alpha=0.05$  (two-sided),  $\beta=0.20$  (power 80%)). The blue cumulative z-curve was constructed using a fixed-effects model and crossed the boundary for futility.



**e Figure 4: Trial sequential analysis for all-cause mortality, RRR=7.5%**

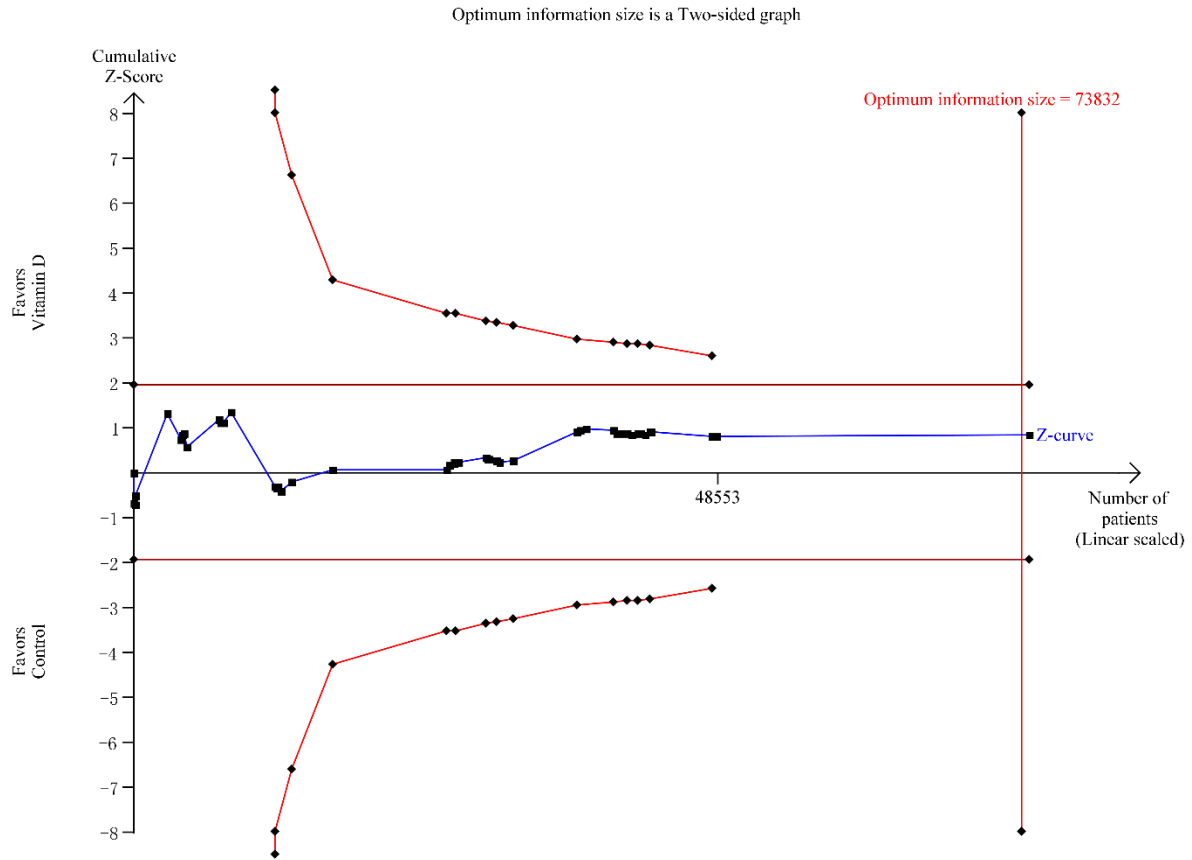

A diversity-adjusted information size (DIS) size of 73832 patients was calculated based on an anticipated relative risk reduction (RRR) of 7.5% (event proportion of 12% in the control arm,  $\alpha=0.05$  (two-sided),  $\beta=0.20$  (power 80%)). The blue cumulative z-curve was constructed using a fixed-effects model and crossed the boundary for futility.

**eFigure 5: Trial sequential analysis for all-cause mortality, RRR=5%**

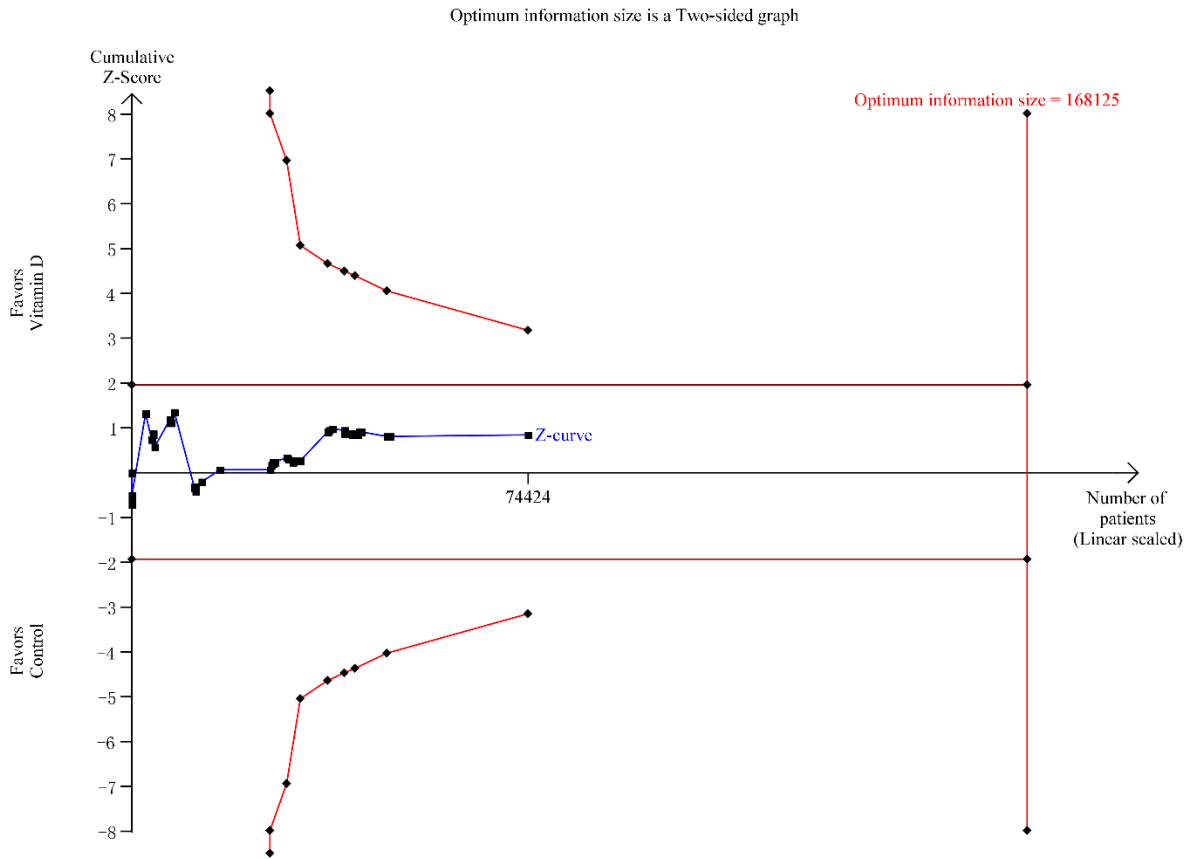

A diversity-adjusted information size (DIS) size of 168125 patients was calculated based on an anticipated relative risk reduction (RRR) of 5% (event proportion of 12% in the control arm,  $\alpha=0.05$  (two-sided),  $\beta=0.20$  (power 80%)). The blue cumulative z-curve was constructed using a fixed-effects model and did not cross the boundary for futility.

**eFigure 6: Funnel plot of all-cause mortality**

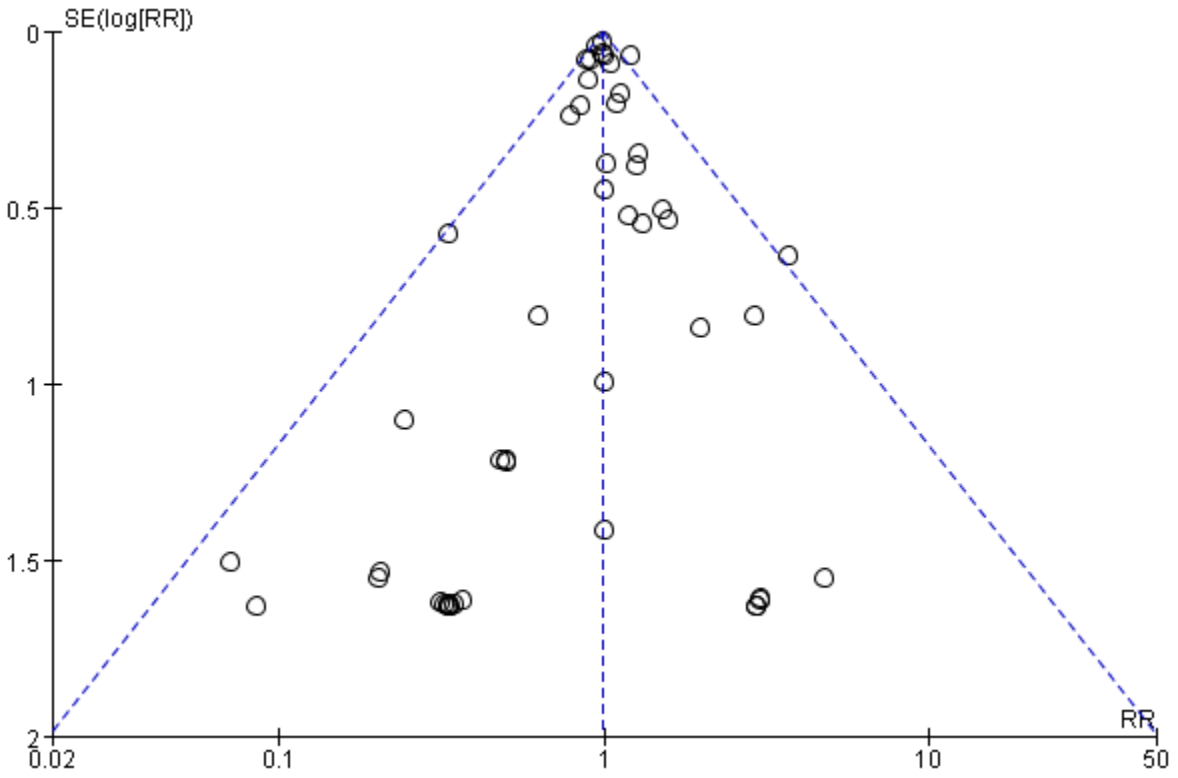

**eFigure 7: Forest plot of cerebrovascular disease mortality of all trials evaluating vitamin D supplementation**

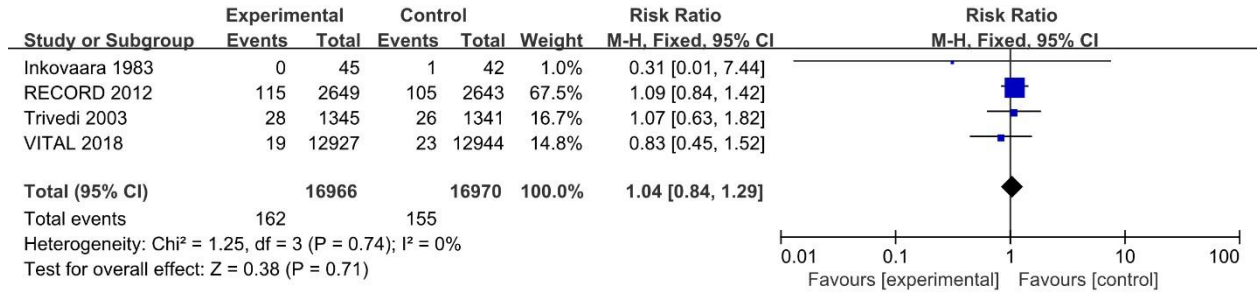

**eFigure 8: Forest plot of ischaemic heart disease mortality of all trials evaluating vitamin D supplementation**

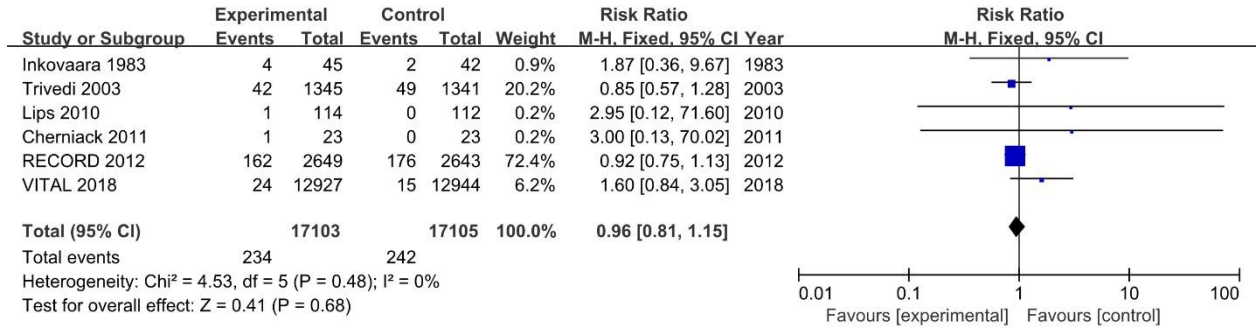

**eFigure 9: Meta-regression for all-cause mortality by length of follow-up**

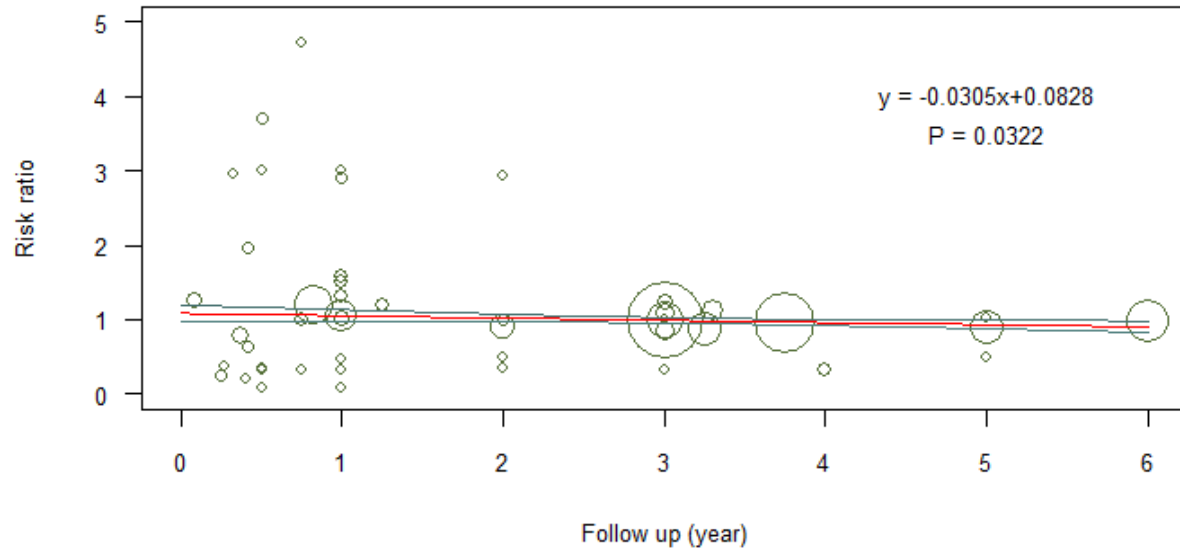

**eFigure 10: Meta-regression for all-cause mortality by 25(OH)D (nmol/L)**

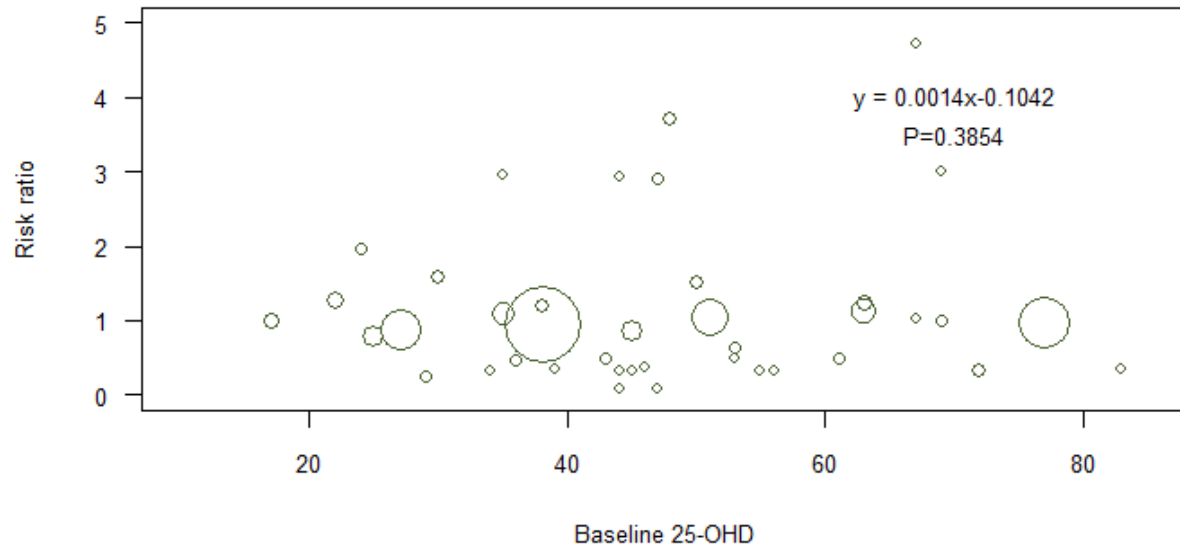

Supplement: zhay049347.ww.pdf [file zhay049347.ww.pdf]
